# Supplementary material for: Differences in SpeB protease activity among group A streptococci associated with superficial, invasive, and autoimmune disease
Source: PubMed Central journal article supplement (PMC5435240; doi:10.1371/journal.pone.0177784), 2017-05-17
Supplement: pone.0177784.s002.pdf [file pone.0177784.s002.pdf]

**S2 Table. Distribution of shared *emm* types among clinical disease groups.**

| Disease     | No. of isolates | No. of <i>emm</i> types represented | % of disease isolates having an <i>emm</i> type overlapping with <i>emm</i> types of isolates from cases of: |     |          |          |
|-------------|-----------------|-------------------------------------|--------------------------------------------------------------------------------------------------------------|-----|----------|----------|
|             |                 |                                     | Pharyngitis                                                                                                  | ARF | Invasive | Impetigo |
| Pharyngitis | 146             | 21                                  | 100                                                                                                          | 66  | 84       | 15       |
| ARF         | 42              | 20                                  | 57                                                                                                           | 100 | 57       | 7        |
| Invasive    | 60              | 20                                  | 88                                                                                                           | 9   | 100      | 5        |
| Impetigo    | 74              | 39                                  | 19                                                                                                           | 9   | 9        | 100      |
