# Supplementary material for: Differences in SpeB protease activity among group A streptococci associated with superficial, invasive, and autoimmune disease
Source: PubMed Central journal article supplement (PMC5435240; doi:10.1371/journal.pone.0177784), 2017-05-17
Supplement: pone.0177784.s003.pdf [file pone.0177784.s003.pdf]

**S3 Table. Comparison of SpeB phenotype assignment to range of activity by the azocasein broth assay.**

| <i>emm</i> type | % azocasein activity for SpeB-non-producer strains <sup>a</sup> | % azocasein activity for SpeB-producer strains <sup>a</sup> |
|-----------------|-----------------------------------------------------------------|-------------------------------------------------------------|
| 2               | 0                                                               | 38 - 86                                                     |
| 3               | 0                                                               | 29 - 95                                                     |
| 4               | 0                                                               | 88 - 117                                                    |
| 5               | n.d.                                                            | 40 - 79                                                     |
| 6               | 0 - 0.5                                                         | 5 - 92                                                      |
| 18              | 0                                                               | n.d.                                                        |

<sup>a</sup> Based on findings from Columbia-SM agar assay
