# Supplementary material for: Differences in SpeB protease activity among group A streptococci associated with superficial, invasive, and autoimmune disease
Source: PubMed Central journal article supplement (PMC5435240; doi:10.1371/journal.pone.0177784), 2017-05-17

**S1 Figure. Heterogeneity in SpeB phenotype among all clinical isolates sharing the most common *emm* types.** The fractional distribution of SpeB-producers (dark gray) and SpeB non-producers (light gray) is plotted in accordance with *emm* type, for all isolates of the most common *emm* types: *emm1* (N = 46 isolates); *emm2* (N = 11); *emm3* (N = 29); *emm4* (N = 11); *emm6* (N = 20); *emm12* (N = 27); *emm18* (N = 11); *emm28* (N = 17); *emm89* (N = 10). SpeB phenotype is based on the Columbia-SM agar assay.

Figure S1

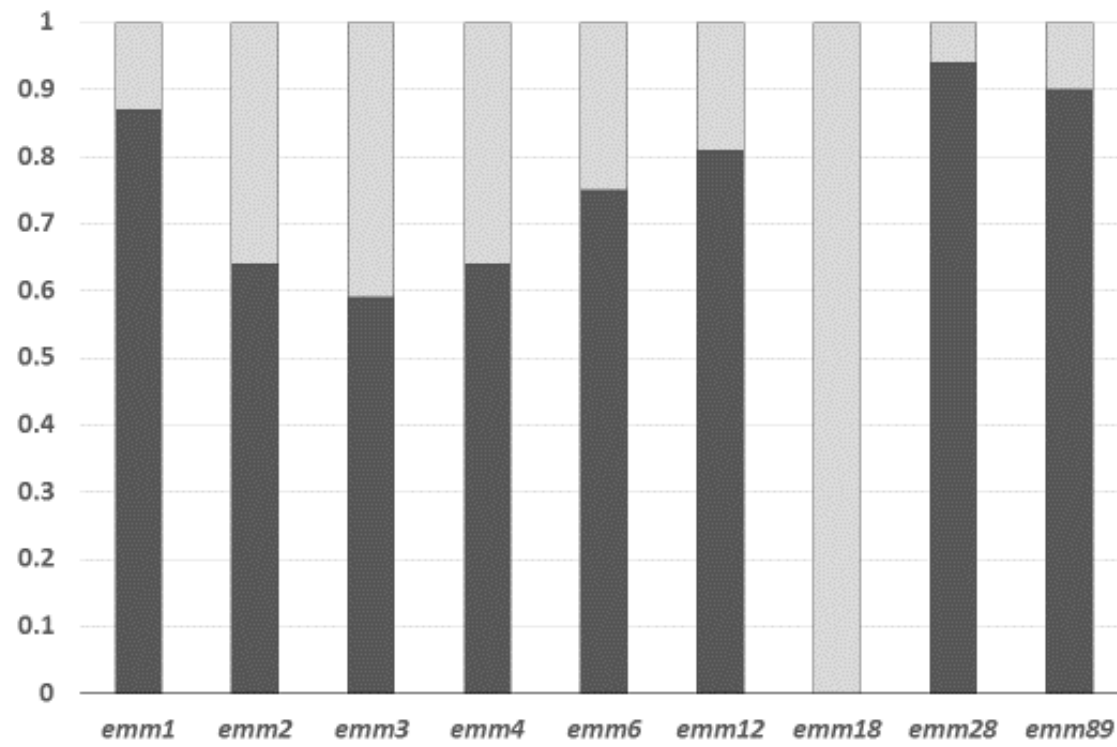

Supplement: pone.0177784.s004.pdf [file pone.0177784.s004.pdf]
